# Supplementary material for: Symptom-Based Dispatching in an Emergency Medical Communication Centre: Sensitivity, Specificity, and the Area under the ROC Curve
Source: MDPI journal article supplement (doi:10.3390/ijerph17218254), 2020-11-09
Supplement: s1 [file s1]

**Table S2:** Symptoms epidemiology, dispatch priority, prevalence of severe symptoms, and association between dispatch / NACA score

|                                                       | All evaluations, n (%) | NACA score ≥ 4 (severe symptoms) | Dispatch priority P1 (with L&S) | Sensitivity (95% CI)    | Specificity (95% CI)    | PPV (95%CI)             | NPV (95%CI)             |
|-------------------------------------------------------|------------------------|----------------------------------|---------------------------------|-------------------------|-------------------------|-------------------------|-------------------------|
| <b>All Symptoms evaluations</b>                       | <b>148'979</b>         | <b>31'269 (21.0)</b>             | <b>89'410 (60.0)</b>            | <b>87.5 [87.1-87.8]</b> | <b>47.3 [47.0-47.6]</b> | <b>30.6 [30.3-30.9]</b> | <b>93.4 [93.2-93.6]</b> |
| <b>Age, years (±SD)</b>                               | 58.9 (±26.3)           | 64.5 (±24.0)                     | 56.2 (±26.6)                    |                         |                         |                         |                         |
| <b>Male sex</b>                                       | 70'726 (47.5)          | 15'896 (22.5)                    | 44'044 (62.3)                   |                         |                         |                         |                         |
| <b>Female sex</b>                                     | 71'839 (48.2)          | 14'206 (19.8)                    | 40'777 (56.8)                   |                         |                         |                         |                         |
| <b>Heart, circulatory and respiratory</b>             | <b>30'906 (20.7)</b>   | <b>13'790 (44.6)</b>             | <b>26'518 (85.8)</b>            | <b>95.0 [94.6-95.3]</b> | <b>21.6 [21.0-22.2]</b> | <b>49.4 [48.9-50.0]</b> | <b>84.3 [83.1-85.3]</b> |
| Chest pain*                                           | 8'817 (5.9)            | 5'114 (58.0)                     | 8'343 (94.6)                    | 98.2 [97.8-98.5]        | 10.3 [9.3-11.3]         | 60.2 [59.1-61.2]        | 80.4 [76.5-83.9]        |
| Cardiac arrest or death*                              | 1'677 (1.1)            | 946 (56.4)                       | 1'600 (95.4)                    | 99.9 [99.4-100.0]       | 10.4 [8.3-12.8]         | 59.1 [56.6-61.5]        | 98.7 [93.0-100.0]       |
| Dyspnoea / shortness of breath**                      | 13'556 (9.1)           | 5'435 (40.1)                     | 11'375 (83.9)                   | 94.0 [93.3-94.6]        | 22.8 [21.9-23.7]        | 44.9 [44.0-45.8]        | 85.0 [83.4-86.4]        |
| Heart rhythm disorder                                 | 3'357 (2.3)            | 1'002 (38.1)                     | 2'704 (80.5)                    | 8.9 [8.7-9.1]           | 25.3 [23.4-27.3]        | 45.4 [43.5-47.3]        | 76.6 [73.1-79.8]        |
| Arterial hypotension, shock                           | 1'303 (0.9)            | 407 (31.2)                       | 949 (72.8)                      | 89.4 [86.0-92.2]        | 34.7 [31.6-37.9]        | 38.4 [35.3-41.5]        | 87.9 [84.0-91.1]        |
| Choking**                                             | 188 (0.1)              | 53 (28.2)                        | 174 (92.6)                      | 98.1 [89.9-100.0]       | 9.6 [5.2-15.9]          | 29.9 [23.2-37.3]        | 92.9 [66.1-99.8]        |
| High blood pressure                                   | 1'388 (0.9)            | 349 (25.1)                       | 890 (64.1)                      | 79.9 [75.4-84.0]        | 41.2 [38.2-44.3]        | 31.3 [28.3-34.5]        | 85.9 [82.6-88.9]        |
| Respiratory difficulty in children under 6 years      | 620 (0.4)              | 105 (16.9)                       | 483 (77.9)                      | 98.1 [93.3-99.8]        | 26.2 [22.5-30.2]        | 21.3 [17.8-25.3]        | 98.5 [94.8-99.8]        |
| <b>Neurological, psychiatric</b>                      | <b>37'658 (25.3)</b>   | <b>9'036 (24.0)</b>              | <b>22'919 (60.9)</b>            | <b>86.1 [85.3-86.8]</b> | <b>47.1 [46.5-47.7]</b> | <b>33.9 [33.3-34.6]</b> | <b>91.5 [91.0-91.9]</b> |
| Stroke (or suspicion)                                 | 5'675 (3.8)            | 3'522 (62.1)                     | 4'889 (86.1)                    | 93.9 [93.1-94.7]        | 26.6 [24.7-28.5]        | 67.7 [66.3-69.0]        | 72.8 [69.5-75.9]        |
| Coma / disturbance of consciousness*                  | 5'213 (3.5)            | 1'949 (37.4)                     | 4'909 (94.2)                    | 97.1 [96.3-97.8]        | 7.6 [6.7-8.6]           | 38.6 [37.2-39.9]        | 81.6 [76.8-85.8]        |
| Convulsions / seizure**                               | 2'533 (1.7)            | 632 (25.0)                       | 2'371 (93.6)                    | 97.2 [95.5-98.3]        | 7.6 [6.4-8.9]           | 25.9 [24.1-27.7]        | 88.9 [83.0-93.3]        |
| Headache*                                             | 1'295 (0.9)            | 316 (24.4)                       | 765 (59.1)                      | 77.5 [72.5-82.0]        | 46.9 [43.7-50.1]        | 32.0 [28.7-35.4]        | 86.6 [83.4-89.4]        |
| Intoxication with drugs / overdose                    | 3'483 (2.3)            | 804 (23.1)                       | 2'388 (68.6)                    | 83.3 [80.6-85.8]        | 35.9 [34.1-37.7]        | 28.1 [26.3-29.9]        | 87.8 [86.7-89.6]        |
| Confusion / hallucination                             | 2'470 (1.7)            | 331 (13.4)                       | 530 (21.5)                      | 44.7 [39.3-50.2]        | 82.1 [89.5-83.7]        | 27.9 [24.1-32.0]        | 90.6 [89.2-91.8]        |
| Panic attack / suicidal ideation                      | 2'802 (1.9)            | 344 (12.3)                       | 717 (25.6)                      | 49.4 [44.0-54.8]        | 77.7 [76.0-79.4]        | 23.7 [20.6-27.0]        | 91.6 [90.4-92.8]        |
| Syncope / lipothymia                                  | 4'405 (3.0)            | 519 (11.8)                       | 3'003 (68.2)                    | 78.0 [74.2-81.5]        | 33.1 [31.7-34.6]        | 13.5 [12.3-14.8]        | 91.9 [90.3-93.2]        |
| Seizure / febrile condition in children under 6 years | 475 (0.3)              | 55 (11.6)                        | 446 (93.9)                      | 100.0 [93.5-100.0]      | 6.9 [4.7-9.8]           | 12.3 [9.4-15.7]         | 100.0 [88.1-100.0]      |
| Agitation / aggressiveness                            | 2'981 (2.0)            | 278 (9.3)                        | 880 (29.5)                      | 50.0 [44.0-56.0]        | 72.6 [71.0-74.3]        | 15.8 [13.4-18.4]        | 93.4 [92.2-94.4]        |
| Alcoholic intoxication                                | 4'421 (3.0)            | 209 (4.7)                        | 1'901 (43.0)                    | 53.6 [46.6-60.5]        | 57.5 [56.0-59.0]        | 5.9 [4.9-7.0]           | 96.2 [95.3-96.9]        |
| Anxiety / depression                                  | 1'905 (1.3)            | 77 (4.0)                         | 120 (6.3)                       | 24.7 [15.6-35.8]        | 94.5 [93.3-95.5]        | 15.8 [9.8-23.6]         | 96.8 [95.8-97.5]        |
| <b>General symptoms, other</b>                        | <b>32'452 (21.8)</b>   | <b>4'934 (15.2)</b>              | <b>16'470 (50.8)</b>            | <b>79.1 [78.0-80.3]</b> | <b>54.3 [53.7-54.9]</b> | <b>23.7 [23.1-24.2]</b> | <b>93.6 [93.2-93.9]</b> |
| Allergies*                                            | 1'252 (0.8)            | 376 (30.0)                       | 1058 (84.5)                     | 95.2 [92.5-97.1]        | 20.1 [17.5-22.9]        | 33.8 [31.0-36.8]        | 90.7 [85.7-94.4]        |
| New born and infant evaluation                        | 109 (0.1)              | 27 (24.8)                        | 109 (100.0)                     | 100.0 [87.2-100.0]      | 0.0 [0.0-4.4]           | 24.8 [17.0-34.0]        | 0.0 [-]                 |
| Bleeding                                              | 2'888 (1.9)            | 691 (23.9)                       | 1'700 (58.9)                    | 84.8 [81.9-87.4]        | 49.3 [47.2-51.4]        | 34.5 [32.2-36.8]        | 91.1 [89.4-92.7]        |
| Hypothermia                                           | 64 (0.0)               | 14 (21.9)                        | 40 (62.5)                       | 78.6 [49.2-95.3]        | 42.0 [28.2-56.8]        | 27.5 [14.6-43.9]        | 87.5 [67.6-97.3]        |
| Person lying, without possibility to evaluate         | 7'289 (4.9)            | 1'558 (21.4)                     | 6'351 (87.1)                    | 96.5 [95.5-97.4]        | 15.4 [14.5-16.4]        | 23.8 [22.8-24.9]        | 94.2 [92.6-95.6]        |
| Hypoglycaemia / hyperglycaemias                       | 631 (0.4)              | 111 (17.6)                       | 380 (60.2)                      | 82.9 [74.6-89.4]        | 44.6 [40.3-49.0]        | 24.2 [20.0-28.8]        | 92.4 [88.4-95.4]        |
| Unspecified malaise                                   | 7'023 (4.7)            | 946 (13.5)                       | 3'977 (56.6)                    | 73.2 [70.2-76.0]        | 45.9 [44.7-47.2]        | 17.4 [16.2-18.6]        | 91.7 [90.6-92.6]        |
| Fever / flue-like condition                           | 1'772 (1.2)            | 199 (11.2)                       | 315 (17.8)                      | 50.3 [43.1-57.4]        | 86.3 [84.5-88.0]        | 31.7 [26.6-37.2]        | 93.2 [91.8-94.4]        |
| Other                                                 | 9'117 (6.1)            | 883 (9.7)                        | 2'351 (25.8)                    | 56.3 [52.9-59.6]        | 77.5 [76.6-78.4]        | 21.1 [19.5-22.8]        | 94.3 [93.7-94.8]        |

|                                                         |                      |                    |                      |                         |                         |                         |                         |
|---------------------------------------------------------|----------------------|--------------------|----------------------|-------------------------|-------------------------|-------------------------|-------------------------|
| Oto-rhino-laryngological problems                       | 328 (0.2)            | 25 (7.6)           | 56 (17.1)            | 48.0 [27.8-68.7]        | 85.5 [81.0-89.2]        | 21.4 [11.6-34.4]        | 95.2 [92.0-97.4]        |
| Ophthalmological problems                               | 80 (0.1)             | 6 (7.5)            | 20 (25.0)            | 66.7 [22.3-95.7]        | 78.4 [67.3-87.1]        | 20.0 [5.7-43.7]         | 96.7 [88.5-99.6]        |
| Pain / oedema of a limb                                 | 1'425 (0.8)          | 78 (5.5)           | 113 (7.9)            | 28.2 [18.6-39.5]        | 93.2 [91.8-94.5]        | 19.5 [12.6-28.0]        | 95.7 [94.5-96.8]        |
| Social hospitalization                                  | 474 (0.3)            | 20 (4.2)           | 0 (0.0)              | 0.0 [0.0-16.9]          | 100.0 [99.2-100.0]      | 0.0 [-]                 | 95.8 [93.6-97.4]        |
| <b>Trauma, accidents</b>                                | <b>34'772 (23.3)</b> | <b>2'548 (7.3)</b> | <b>20'221 (58.2)</b> | <b>80.0 [78.4-81.6]</b> | <b>43.6 [43.0-44.1]</b> | <b>10.1 [9.7-10.5]</b>  | <b>96.5 [96.2-96.8]</b> |
| Polytrauma (or suspicion)                               | 73 (0.1)             | 42 (57.5)          | 73 (100.0)           | 100.0 [91.6-100.0]      | 0.0 [0.0-11.2]          | 57.5 [45.4-69.0]        | 0.0 [-]                 |
| Diving accident*                                        | 9 (0.0)              | 5 (55.6)           | 9 (100.0)            | 100.0 [47.8-100.0]      | 0.0 [0.0-60.2]          | 55.6 [21.2-86.3]        | 0.0 [-]                 |
| Electrocution                                           | 53 (0.0)             | 10 (18.9)          | 47 (88.7)            | 100 [69.2-100.0]        | 14.0 [5.3-27.9]         | 21.3 [10.7-35.7]        | 100.0 [54.1-100]        |
| Burns                                                   | 194 (0.1)            | 34 (17.5)          | 155 (79.9)           | 97.1 [84.7-99.9]        | 23.8 [17.4-31.1]        | 21.3 [15.1-28.6]        | 97.4 [86.5-99.9]        |
| Ingestion, inhalation or exposure to a toxic            | 181 (0.1)            | 22 (12.2)          | 119 (65.7)           | 86.4 [65.1-97.1]        | 37.1 [29.6-45.1]        | 16.0 [9.9-23.8]         | 95.2 [86.5-99.0]        |
| Chest trauma                                            | 974 (0.7)            | 118 (12.1)         | 587 (60.3)           | 77.1 [68.5-84.3]        | 42.1 [38.7-45.4]        | 15.5 [12.7-18.7]        | 93.0 [90.0-95.4]        |
| Cranio-cerebral trauma                                  | 8'468 (5.7)          | 912 (10.8)         | 6'451 (76.2)         | 87.1 [84.7-89.2]        | 25.1 [24.2-26.1]        | 12.3 [11.5-13.1]        | 94.1 [93.0-95.1]        |
| Bites                                                   | 19 (0.0)             | 1 (9.5)            | 11 (57.9)            | 100.0 [2.5-100.0]       | 44.4 [21.5-69.2]        | 9.1 [0.2-41.3]          | 100.0 [63.1-100.0]      |
| Abdominal or pelvic trauma                              | 1'621 (1.1)          | 131 (8.1)          | 589 (36.3)           | 79.4 [71.4-86.0]        | 67.4 [65.0-69.8]        | 17.7 [14.7-21.0]        | 97.4 [96.2-98.3]        |
| Wounds                                                  | 2'151 (1.4)          | 162 (7.5)          | 1'134 (52.7)         | 82.1 [75.3-87.7]        | 49.7 [47.5-51.9]        | 11.7 [9.9-13.7]         | 97.1 [95.9-98.1]        |
| Spinal trauma                                           | 2'632 (1.8)          | 158 (6.8)          | 1'559 (56.2)         | 80.3 [73.7-85.9]        | 42.3 [40.3-44.4]        | 9.2 [7.8-20.7]          | 96.7 [95.5-97.7]        |
| Maxillofacial trauma                                    | 2'911 (2.0)          | 175 (6.0)          | 1'898 (65.2)         | 74.9 [67.8-81.1]        | 35.4 [33.6-37.2]        | 6.9 [5.8-8.1]           | 95.7 [94.2-96.8]        |
| Trauma of a limb                                        | 15'486 (10.4)        | 758 (4.9)          | 7'589 (49.0)         | 70.3 [66.9-73.6]        | 52.1 [51.3-52.9]        | 7.0 [6.5-7.6]           | 97.2 [96.8-97.5]        |
| <b>Abdominal, urological, gynaeco-obstetrical, back</b> | <b>13'191 (8.9)</b>  | <b>961 (7.3)</b>   | <b>3'282 (24.9)</b>  | <b>55.0 [51.8-58.2]</b> | <b>77.5 [76.7-78.2]</b> | <b>16.1 [14.9-17.4]</b> | <b>95.6 [95.2-96.0]</b> |
| Threat of childbirth / childbirth*                      | 370 (0.3)            | 105 (28.4)         | 336 (90.8)           | 98.1 [93.3-99.8]        | 12.1 [8.4-16.6]         | 30.7 [25.8-35.9]        | 94.1 [80.3-99.3]        |
| Miscarriage, vaginal bleeding, pregnancy                | 365 (0.3)            | 100 (27.4)         | 244 (66.8)           | 83.0 [74.2-89.8]        | 39.2 [33.3-45.4]        | 34.0 [28.1-40.3]        | 86.0 [78.5-91.6]        |
| Nausea, vomiting, diarrhoea                             | 1'714 (1.2)          | 161 (9.4)          | 297 (17.3)           | 31.1 [24.0-38.8]        | 84.1 [82.2-85.9]        | 16.8 [12.8-21.6]        | 92.2 [90.6-93.5]        |
| Abdominal pain (non-traumatic)*                         | 6'571 (4.4)          | 447 (6.8)          | 1'950 (29.7)         | 56.4 [51.6-61.0]        | 72.3 [71.1-73.4]        | 12.9 [11.5-14.5]        | 95.8 [95.1-96.3]        |
| Genital or urinary involvement                          | 1'342 (0.9)          | 55 (4.1)           | 73 (5.4)             | 30.9 [19.1-44.8]        | 95.6 [94.4-96.7]        | 23.3 [14.1-34.6]        | 97.0 [95.9-97.9]        |
| Back pain                                               | 2'075 (1.4)          | 68 (3.3)           | 182 (8.8)            | 22.1 [12.9-33.8]        | 91.7 [90.4-92.9]        | 8.2 [4.7-13.2]          | 97.2 [96.4-97.9]        |
| Kidney pain                                             | 754 (0.5)            | 25 (3.3)           | 200 (26.5)           | 36.0 [18.0-57.5]        | 73.8 [70.4-77.0]        | 4.5 [2.1-8.4]           | 97.1 [95.4-98.3]        |

All variables given as numbers (group percentages in parenthesis) except age. Sensitivity, specificity, PPV, NPV, are shown in percentage

L&S: Light and Siren; CI: Confidence Interval; PPV: Positive Predictive Value; NPV: Negative Predictive Value. \*: protocol exist; \*\*: protocol exist since 01.01.2017
