# Supplementary figures and images for: Symptom-Based Dispatching in an Emergency Medical Communication Centre: Sensitivity, Specificity, and the Area under the ROC Curve
Source: MDPI journal article supplement (doi:10.3390/ijerph17218254), 2020-11-09

**Figure S1:** Flow chart of study participants

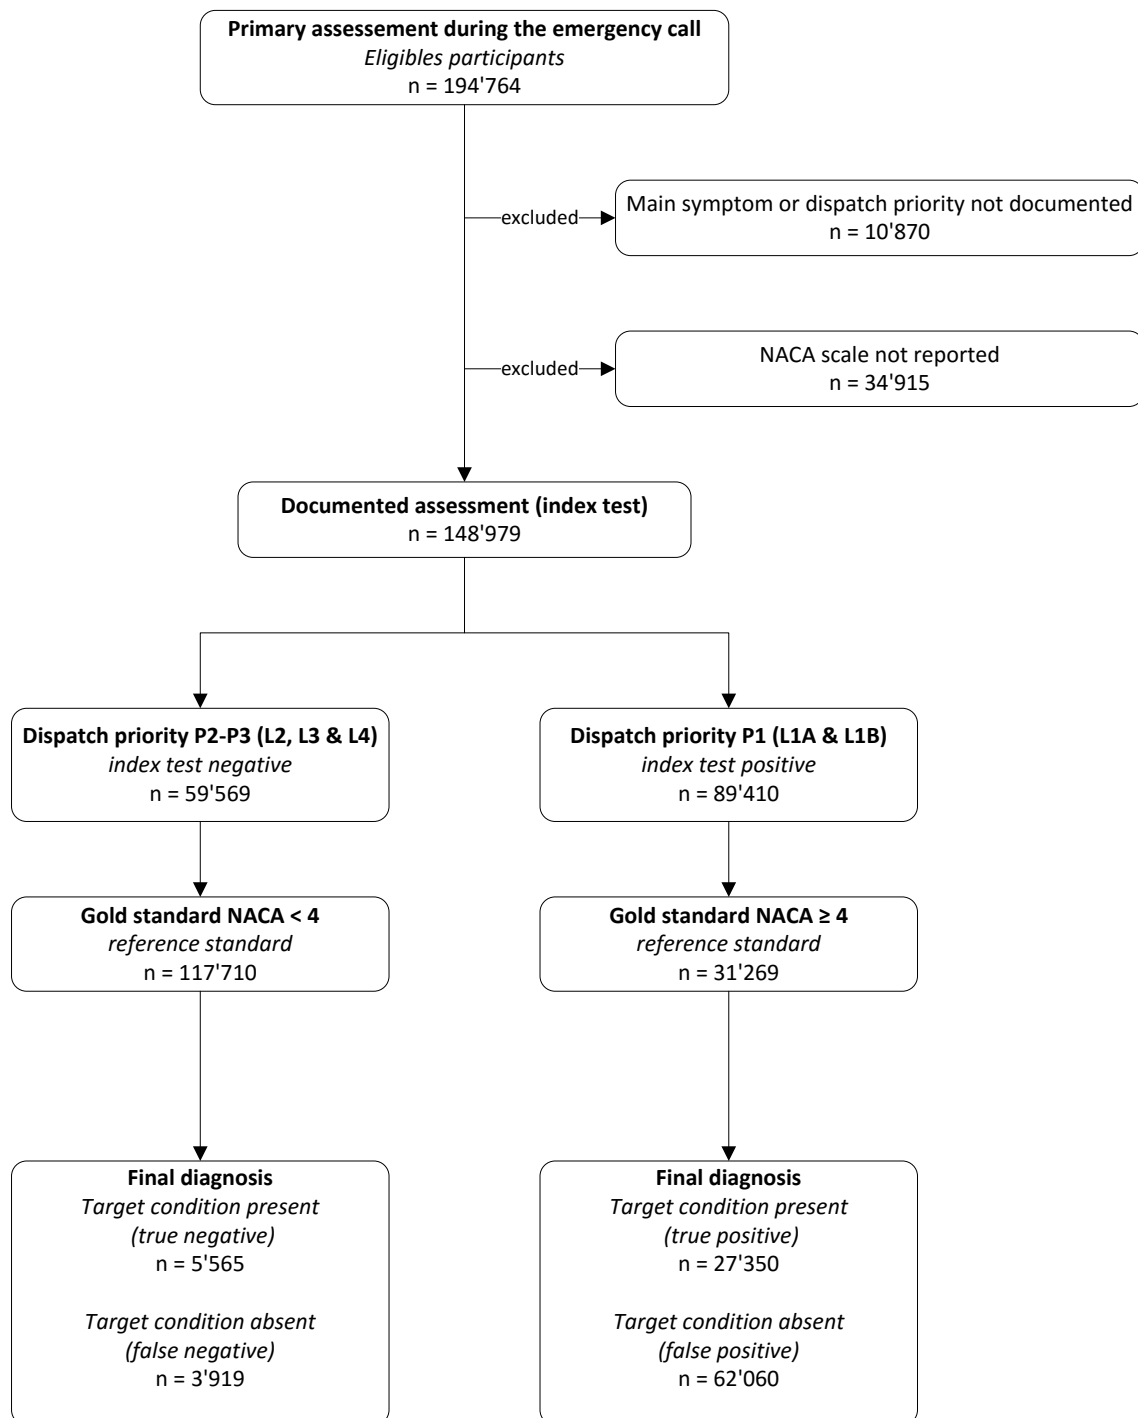

Supplement: s1 [file s1]
